# Supplementary material for: Atomic structures of fibrillar segments of hIAPP suggest tightly mated β-sheets are important for cytotoxicity
Source: eLife. 2017 Jan 3;6:e19273. doi: 10.7554/eLife.19273 (PMC5207774; doi:10.7554/eLife.19273)
Supplement: Supplementary file 1. — DOI: http://dx.doi.org/10.7554/eLife.19273.024 [file elife-19273-supp1.xls]

## Sheet: Sheet1
residue range	peptide sequence	crystal form	interface	sheet symmetry	zipper symmetry class	PDB ID code	references	registry	eclipse/ staggereda	total residues	spg	areaburied per strand	areaburied per residue	Sc	Sheet RMSD from planarityb	charge at pH 7	Sum of hydropathy valuesc	average sheet-to-sheet distanced	standard deviation sheet-to-sheet distance	mininum sheet-to-sheet distance	maximum sheet-to-sheet distance	solvation energy per strand in dry interface cal/mole
13-18	ANFLVH			parallel	2	5e5x	Soriaga et al, J. Phys. Chem. B, 2016	in	stagg	6	P21	151.1	25.1833	0.796	0.13	0.1	0.983	9.31	0.31	8.66	9.64	189
14-19	NFLVHS			antiparallel	7	3fr1	Wiltzius et al., NSMB, 2009	in	eclips	6	P212121	89.3	14.8833	0.777	0.04	0.1	0.55	10.19	0.13	10.06	10.41	139
14-20	NFLVHSS			antiparallel	6	3fth	Wiltzius et al., NSMB, 2009	in	eclips	7	P21	94.1	13.4429	0.537	0.04	0.1	0.357	10.77	0.12	10.51	11.03	134
15-25	FLVHSSNNFGA			antiparallel	6	5ko0	this work	out	eclips	11	P1	118	10.7273	0.664	0.55	0.1	0.291	9.42	2.06	6.55	12.98	19
16-21	LVHSSN			antiparallel	7	5e5z	Soriaga et al, J. Phys. Chem. B, 2016	in	eclips	6	P21	114.8	19.1333	0.473	0.36	0.1	-0.05	9.6	0.36	9.24	9.81	130
18-23	HSSNNF			parallel	4	3fpo	Wiltzius et al., NSMB, 2009	in	stagg	6	P21	131.5	21.9167	0.835	0.06	0.1	-1.5	8.19	0.25	7.69	8.69	90
19-29	SGNNFGAILSS		A	parallel	1	5knZ	this work	in	stagg	11	P212121	265.2	24.1091	0.85	0.32	0	0.245	8.83	1.13	6.57	10.08	279
19-29	SGNNFGAILSS		B	parallel	1	5knZ	this work	in	stagg	11	P212121	152.8	13.8909	0.642	0.32	0	0.245	8.72	1.15	7.45	10.99	150
21-27	NNFGAIL			parallel	1	3dgj	Wiltzius et al. Pro Sci, 2008	in	stagg	7	P212121	128.4	18.3429	0.902	1.04	0	0.786	9	3.85	4.8	15.99	141
22-28	NFGAILS			antiparallel	7	5e5v	Soriaga et al, J. Phys. Chem. B, 2016	out	stagg	7	P1	180.3	25.7571	0.812	0.13	0	1.171	7.81	0.24	7.58	8.38	273
23-29	FGAILSS			antiparallel	6	5e61	Soriaga et al, J. Phys. Chem. B, 2016	in	stagg	7	P1	162.9	23.2714	0.772	0.2	0	1.557	8.24	0.04	8.14	8.28	213
25-30	AILSST			antiparallel	8	3fod	Wiltzius et al., NSMB, 2009	in	eclips	6	P21	111.6	18.6	0.57	0.1	0	1.3	9.77	0.94	7.7	11.74	149
28-33	SSTNVG	1	A	parallel	1	3dg1	Wiltzius et al. Pro Sci, 2008	in	stagg	6	C2	127.2	21.2	0.857	0.25	0	-0.333	5.86	0.41	5.42	6.59	0
28-33	SSTNVG	1	B	parallel	1	3dg1	Wiltzius et al. Pro Sci, 2008	in	stagg	6	C2	82.2	13.7	0.886	0.25	0	-0.333	9.35	0.94	8.33	10.96	115
28-33	SSTNVG	2	A	parallel	1	3ftr	Wiltzius et al., NSMB, 2009	in	stagg	6	P212121	121.6	20.2667	0.806	0.15	0	-0.333	6.93	0.3	6.42	7.25	37
28-33	SSTNVG	2	B	parallel	1	3ftr	Wiltzius et al., NSMB, 2009	in	stagg	6	P212121	80.8	13.4667	0.801	0.15	0	-0.333	9.52	0.48	8.99	10.4	80
31-37	NVGSNTY	1		parallel	1	3ftk	Wiltzius et al., NSMB, 2009	in	stagg	7	P21	116.5	16.6429	0.868	0.68	0	-0.857	9.67	0.28	9.19	9.98	75
31-37	NVGSNTY	2	A	parallel	1	3ftL	Wiltzius et al., NSMB, 2009	in	stagg	7	P21	147.1	21.0143	0.712	0.44	0	-0.857	7.91	0.49	7.37	8.79	-11
31-37	NVGSNTY	2	B	parallel	1	3ftL	Wiltzius et al., NSMB, 2009	in	eclips	7	P21	127	18.1429	0.51	0.44	0	-0.857	9.73	0.4	9.01	10.17	96
	column	note
	J	Staggered means that the strands from one sheet are translationally offset along the fibril axis with respect to the opposing sheet. Eclipsed means there is no offset.
	O	Higher values indicate fuller extension of the beta strand. Smaller values indicate kinking.
	P	RMSD between 3rd order polynomial fit of sheet coordinates projected down fibril axis and corresponding least squares linear fit.
	Q	Hydropathy values calculated from ExPASy Protparam (GRAVY) Kyte & Doolittle values
	R	Sheet-to-sheet distances calculated by fitting 3rd order polynomial to sheet backbones
	V	Atomic solvation parameters obtained from Eisenberg D, Wesson M, Yamashita M (1989) Interpretation of protein folding and binding with atomic solvation parameters. chemica Scripta 29A: 217–221.
